# Supplementary material
Source: PubMed Central journal article supplement (PMC3024774)

## SUPPLEMENTAL DATA

**Supplemental Figure 1. Quantification and statistical analysis of HSF1 in control versus riluzole-treated NG108-15 or N2a neuroprogenitor cells.** Cells were treated with 1-2  $\mu\text{M}$  riluzole for 16 hr and HSF1 was probed by Western blot as described in the text. The results in NG108-15 cells and N2a cells are similar. The integrated density of the HSF1 band was determined by Image J and the raw data for the ten separate pairs/experiments are shown in black. Student's t-test of the two sets of data (paired, two tailed) gave P value of 0.00057 indicating extremely significant difference. We have also analyzed the data by ratio t tests. For this, the integrated density was transformed to logarithm (in red) for a paired, two-tailed t-test. The P value for this ratio t test is 1.80817E-05.

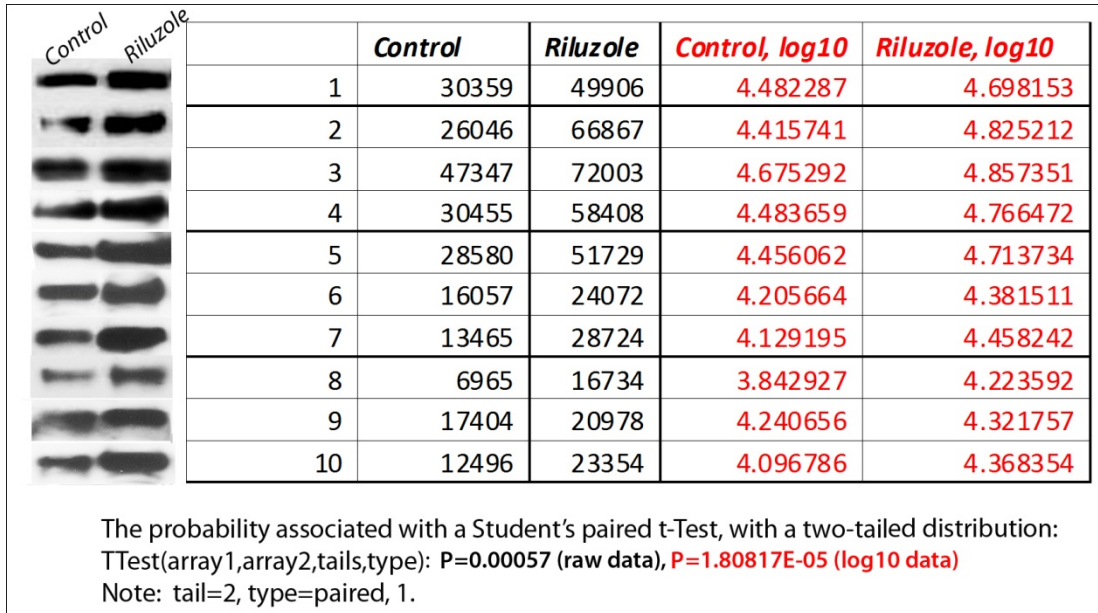

**Supplemental Figure 2. The effect of riluzole in enhancing the basal and heat shock induced hsp70-luciferase reporter gene expression required a pre-incubation period.** The same experiment as that shown in Fig. 3A/B was repeated with riluzole added immediately prior to heat shock. Luciferase activity was assayed using the Dual-Glo luciferase assay system from Promega (E2920) as described. Result represents average  $\pm$  standard deviation (SD) of 4 separate determinations.

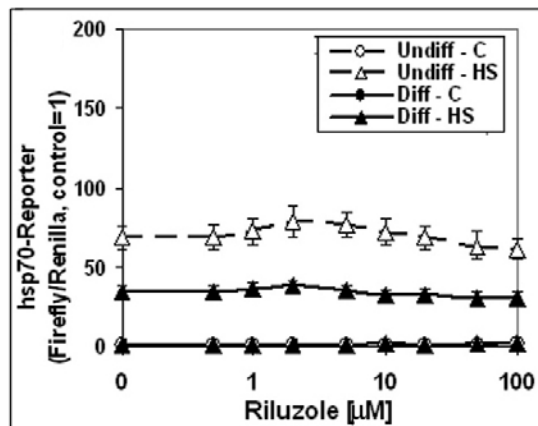

Supplement: supp_M110.158220_jbc.M110.158220-1.pdf [file supp_M110.158220_jbc.M110.158220-1.pdf]
